# Supplementary material for: The effect of neat ionic liquid on the folding of short peptides
Source: Royal Society of Chemistry journal article supplement (doi:10.1039/c1cc11527h), 2011-01-01
Supplement: c1cc11527h.pdf [file c1cc11527h.pdf]

## Electronic Supplementary Information

**Protein Characterization.** As reported, all peptide samples were purchased from GenScript Inc. (Piscataway, NJ). Peptides were synthesized by solid-phase synthesis, purified by reverse-phase HPLC, and verified by LCMS. Figures 1-6 are shown to verify sample identity and purity for AKA<sub>2</sub>, Trp-cage, and Trpzip4.

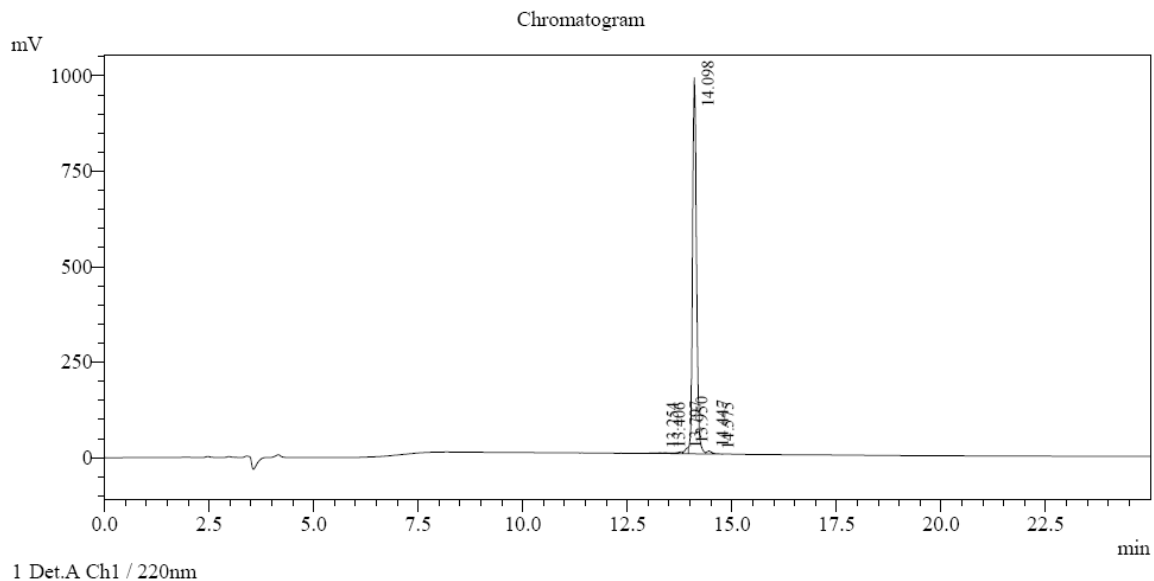

**Figure 1.** Reverse-phase HPLC Chromatogram verifying sample purity for AKA<sub>2</sub>. Data provided by GenScript Inc.

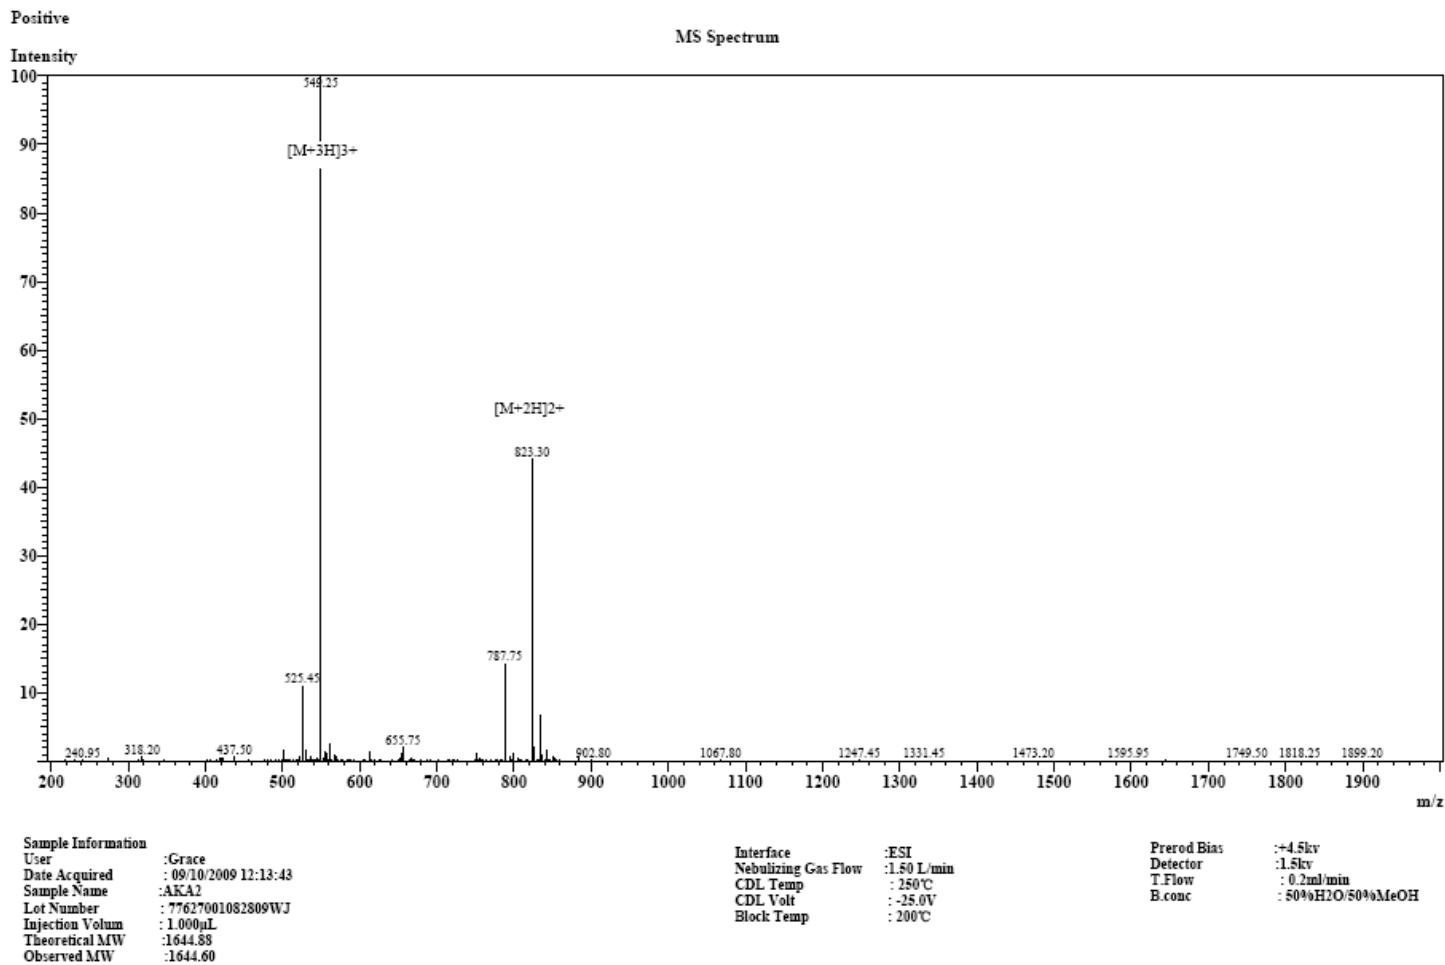

**Figure 2.** LCMS spectrum verifying sample identity for AKA<sub>2</sub>. Data provided by GenScript Inc.

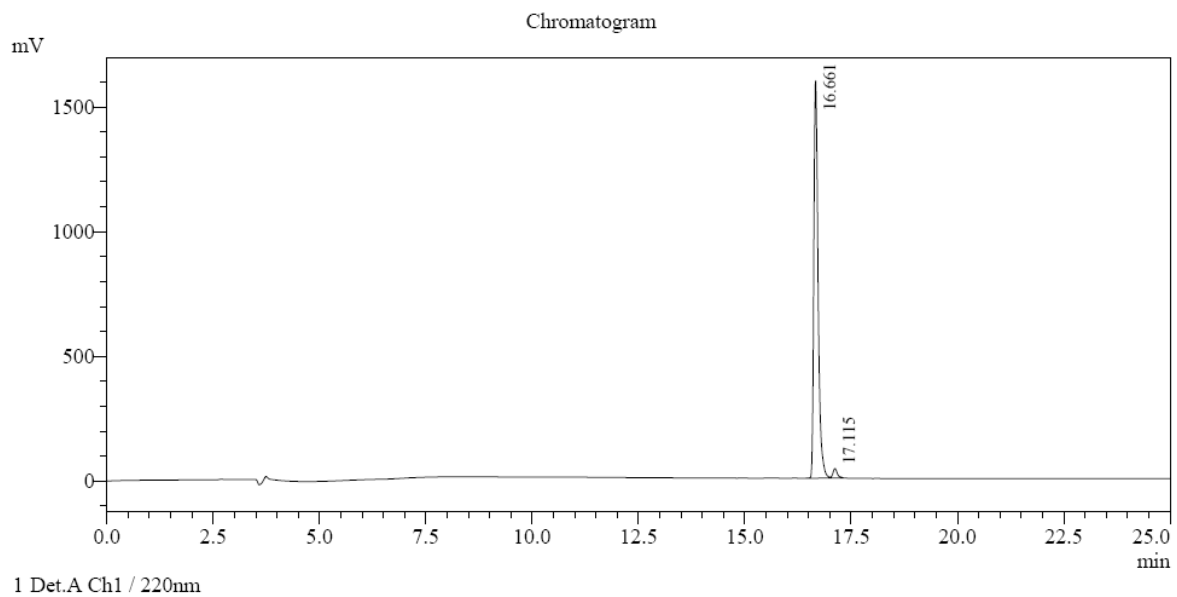

**Figure 3.** Reverse-phase HPLC Chromatogram verifying sample purity for Trp-cage. Data provided by GenScript Inc.

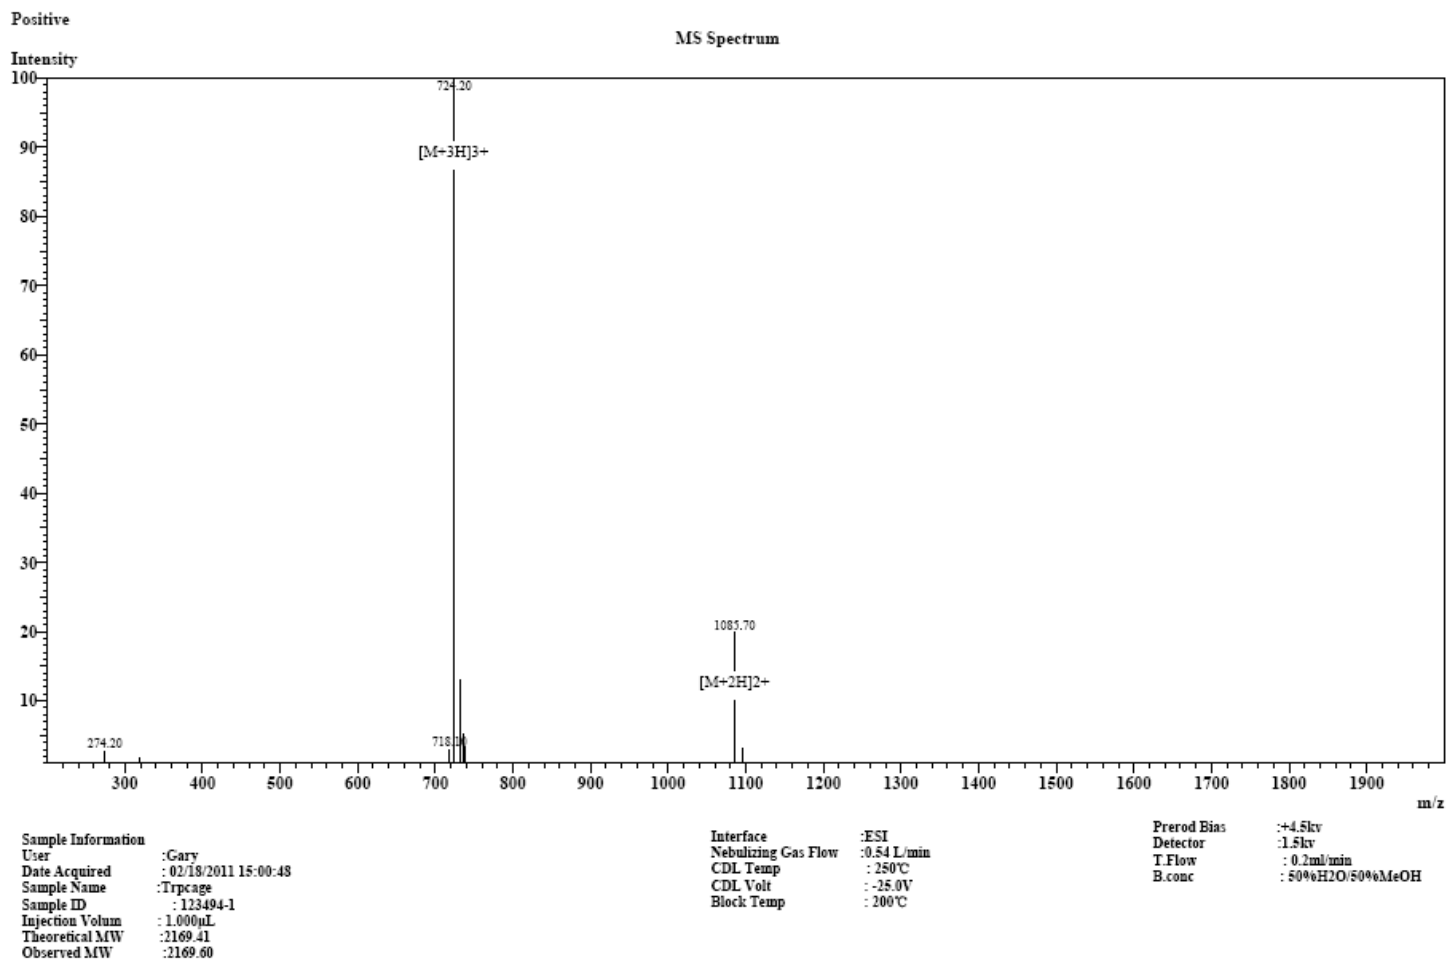

**Figure 4.** LCMS spectrum verifying sample identity for Trp-cage. Data provided by GenScript Inc.

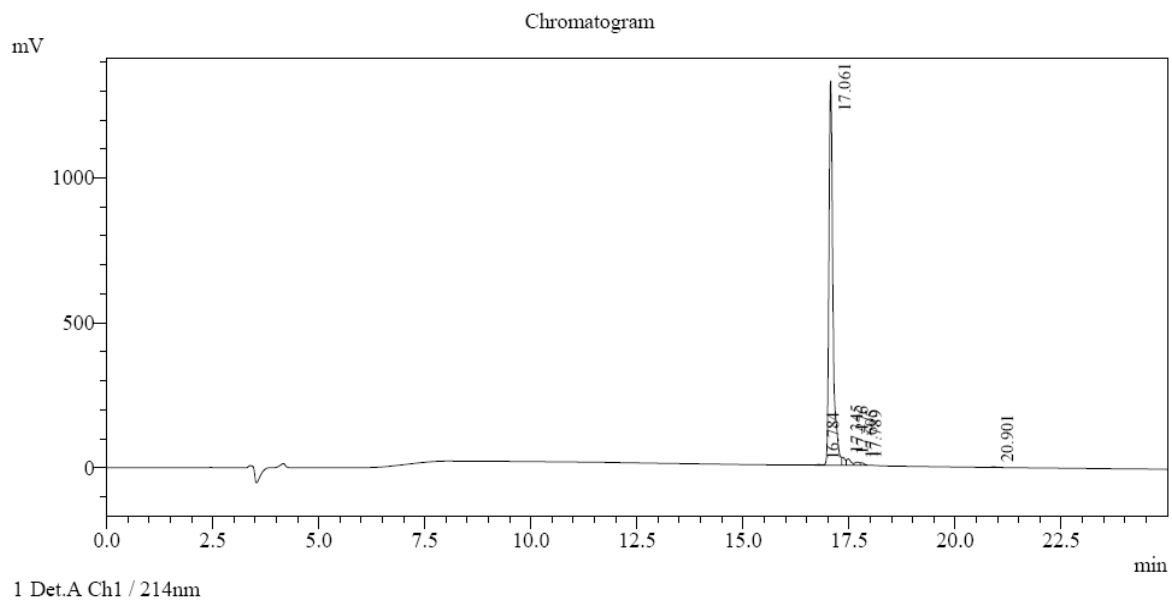

**Figure 5.** Reverse-phase HPLC Chromatogram verifying sample purity for Trpzip4. Data provided by GenScript Inc.

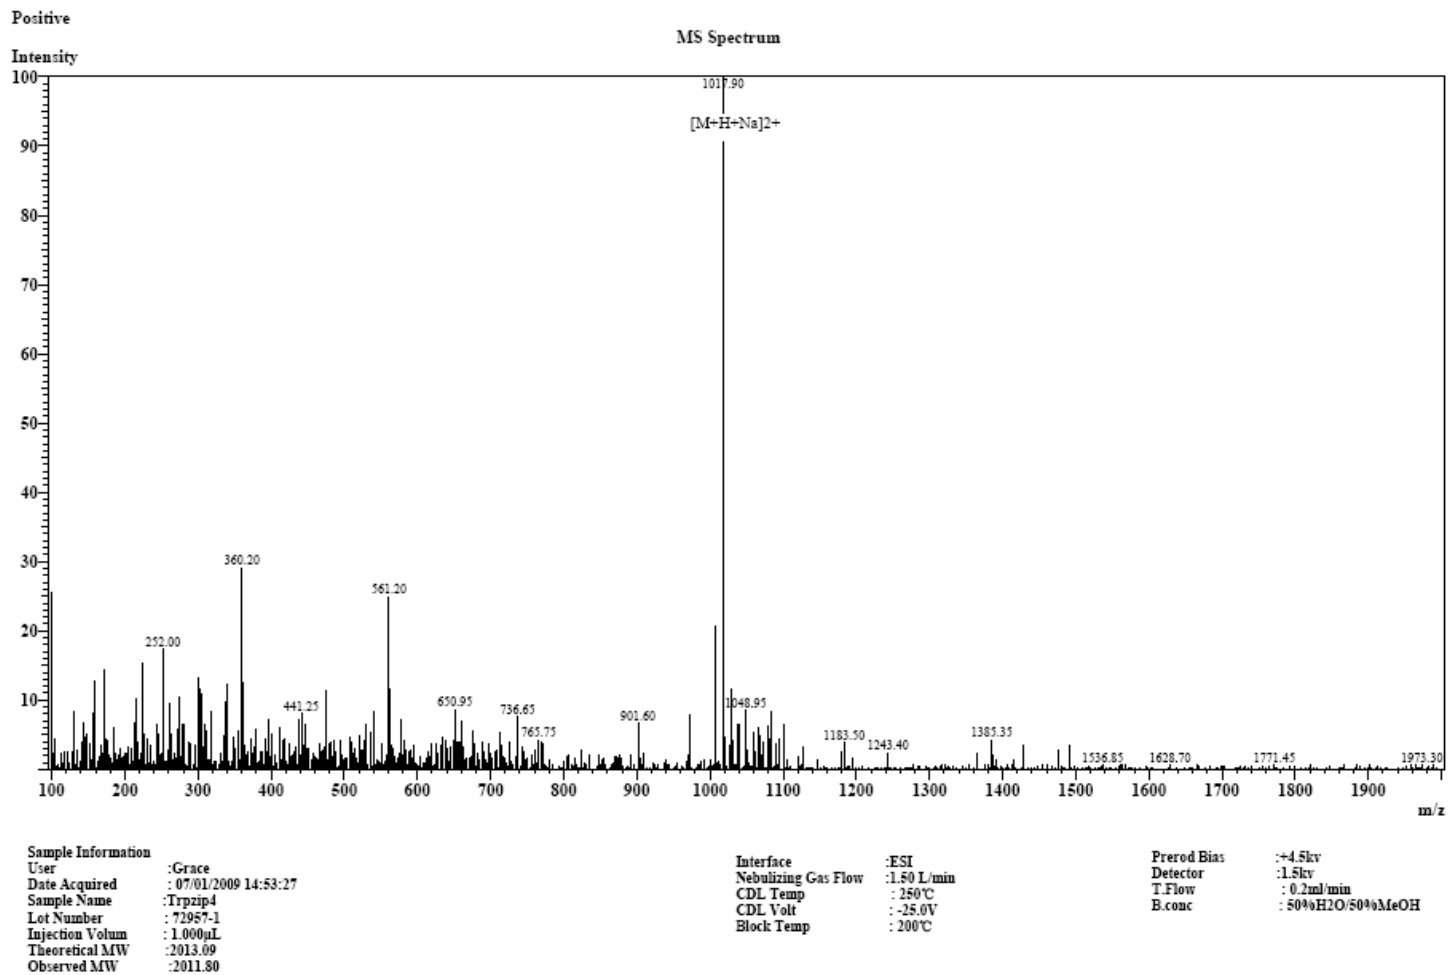

Figure 6. LCMS spectrum verifying sample identity for Trpzip4. Data provided by GenScript Inc.

### UV Absorbance Data.

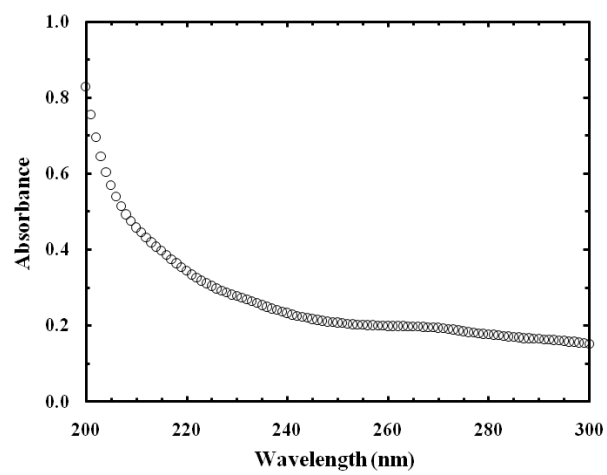

**Figure 7.** UV absorption spectrum of  $[C_4mpy][Tf_2N]$ , collected at room temperature.

## Circular Dichroism Data.

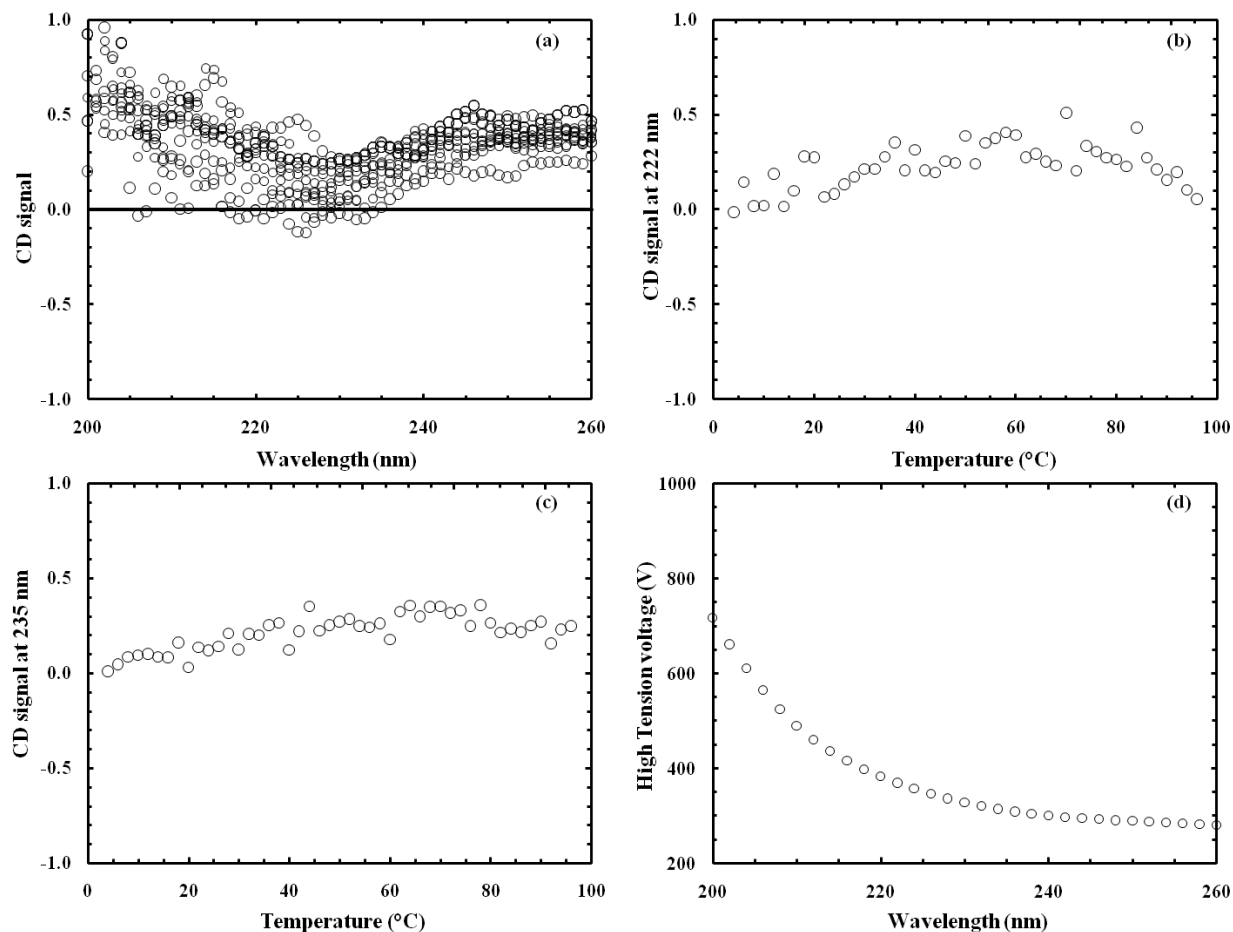

**Figure 8.** (a) [C<sub>4</sub>mpy][Tf<sub>2</sub>N] far-UV spectra and CD signal at (b) 222 nm and (c) 235 nm as a function of temperature. The spectra in (a) are shown for 10 °C intervals from 4 °C to 94 °C. In general, the CD signal at a particular wavelength shows a slight increase with temperature. (d) Representative plot of CD high tension (HT) voltage for peptide samples in IL. Data shown corresponds to 100 μM Trpzip4 in [C<sub>4</sub>mpy][Tf<sub>2</sub>N] and varies little with temperature. Literature suggests that reliable CD data can be obtained when the voltage is less than 700 V.<sup>1</sup> Temperature-induced changes in CD signal are monitored at 222 nm (AKA<sub>2</sub> or Trp-cage) or 235 nm (Trpzip4), where the HT voltage is less than 400 V.



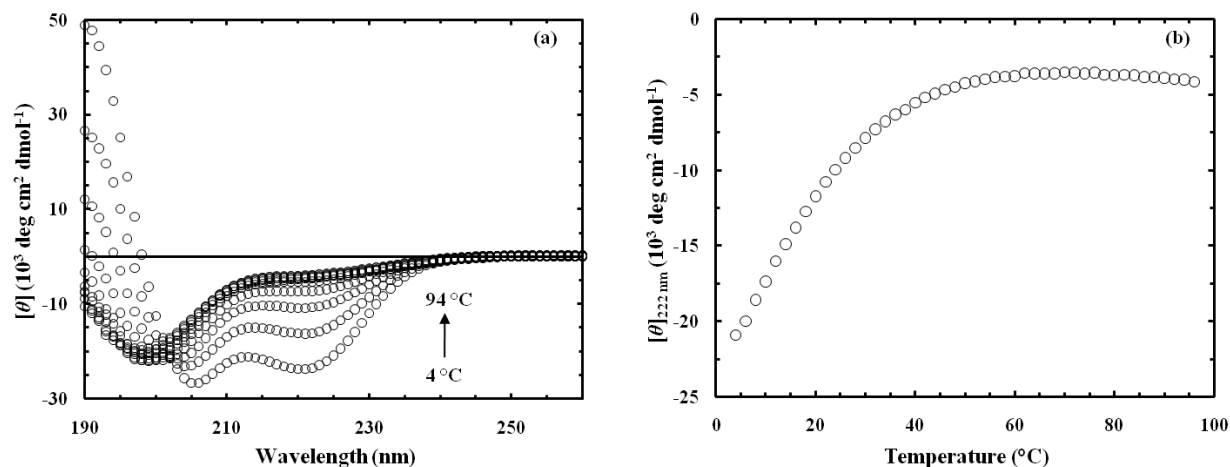

**Figure 9.** (a) Far-UV spectra and (b) mean residue ellipticity at 222 nm of AKA<sub>2</sub> in water as a function of temperature. The spectra in (a) are shown for 10 °C intervals from 4 °C to 94 °C.

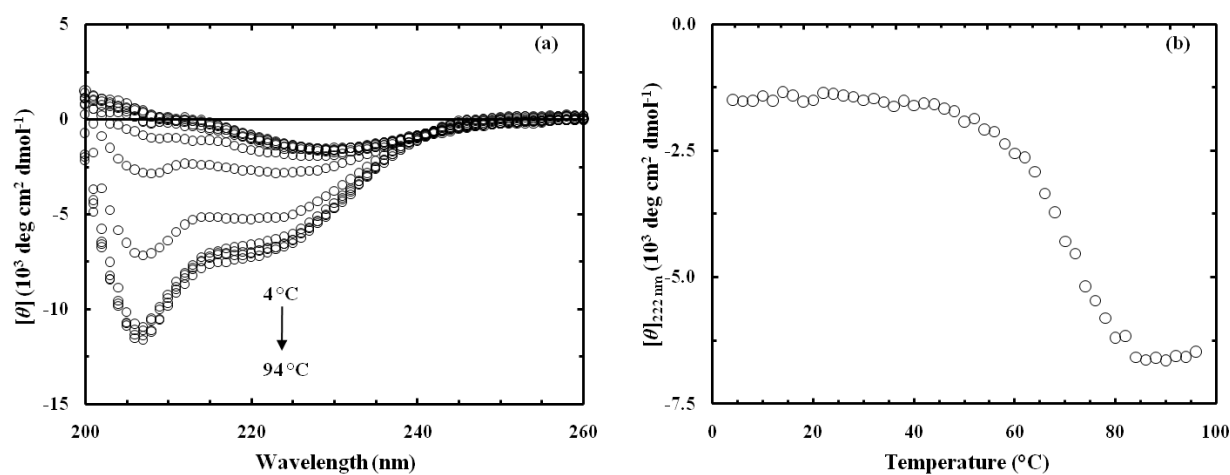

**Figure 10.** (a) Far-UV spectra and (b) mean residue ellipticity at 222 nm of AKA<sub>2</sub> in [C<sub>4</sub>mpy][Tf<sub>2</sub>N] as a function of temperature. The spectra in (a) are shown for 10 °C intervals from 4 °C to 94 °C.

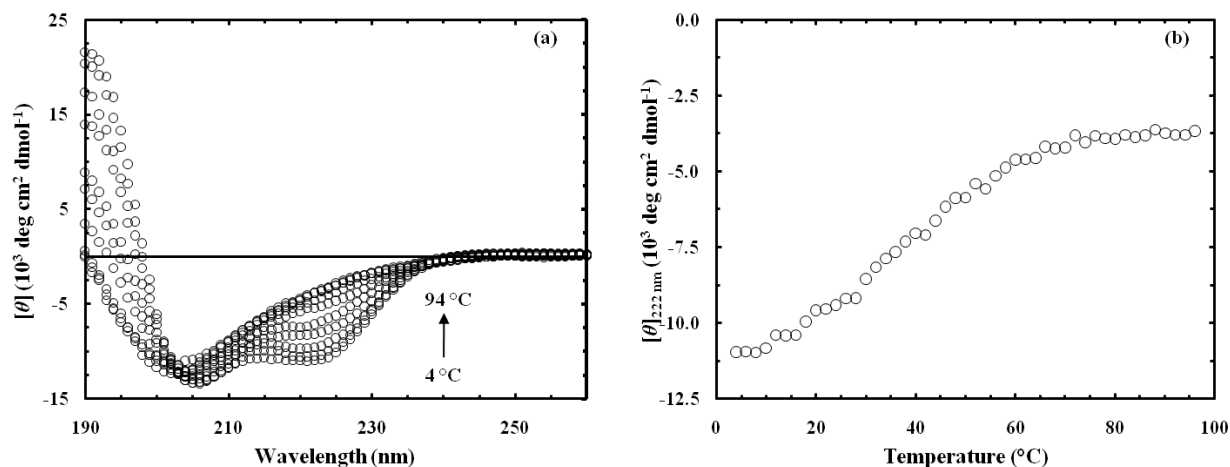

**Figure 11.** (a) Far-UV spectra and (b) mean residue ellipticity at 222 nm of Trp-cage in phosphate buffer as a function of temperature. The spectra in (a) are shown for 10 °C intervals from 4 °C to 94 °C.

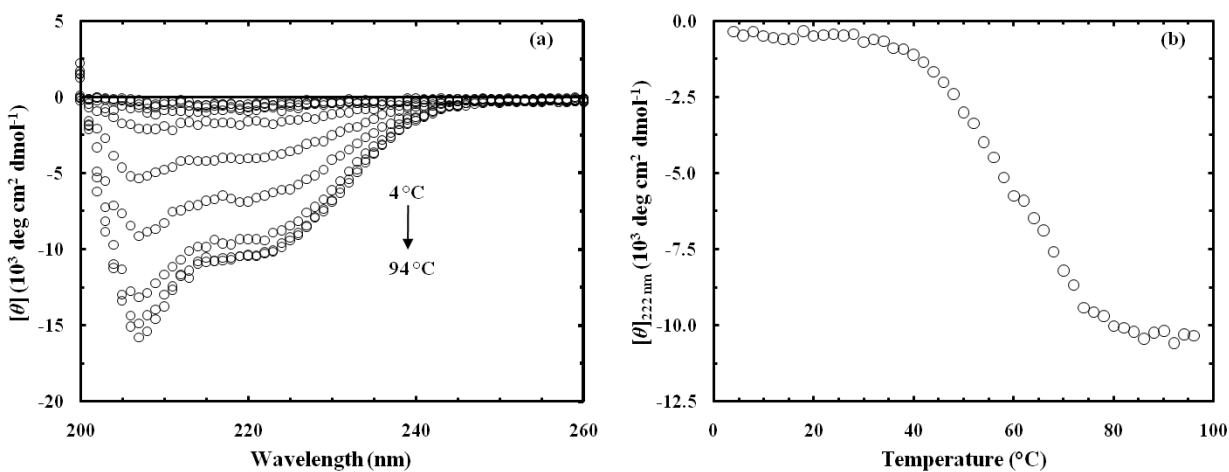

**Figure 12.** (a) Far-UV spectra and (b) mean residue ellipticity at 222 nm of Trp-cage in  $[\text{C}_4\text{mpy}][\text{Tf}_2\text{N}]$  as a function of temperature. The spectra in (a) are shown for 10 °C intervals from 4 °C to 94 °C.

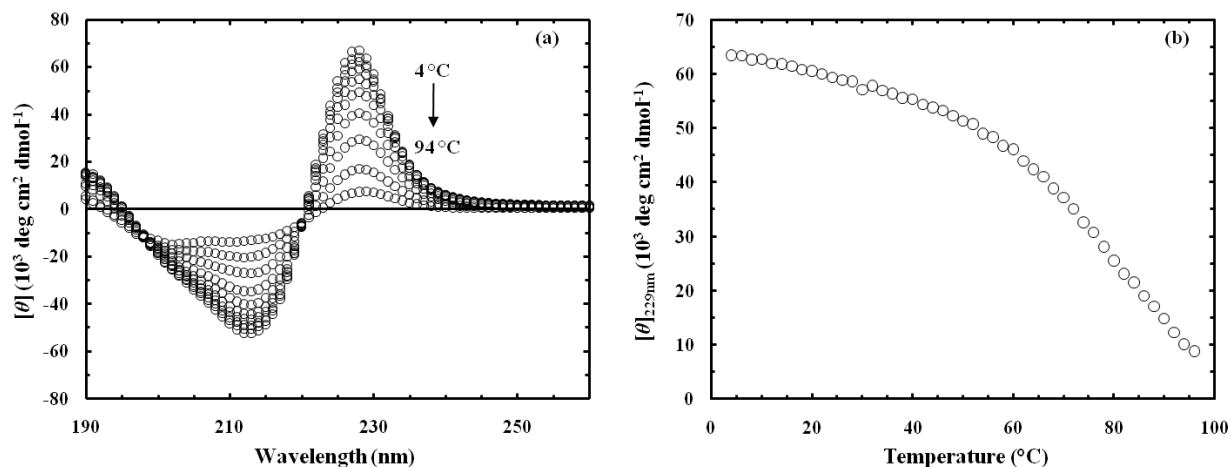

**Figure 13.** (a) Far-UV spectra and (b) mean residue ellipticity at 229 nm of Trpzip4 in phosphate buffer as a function of temperature. The spectra in (a) are shown for 10 °C intervals from 4 °C to 94 °C.

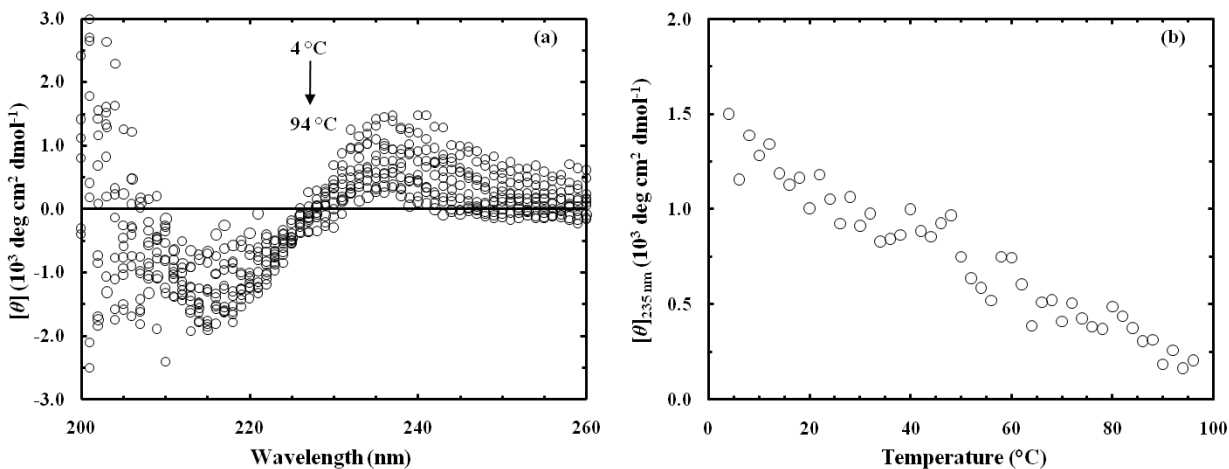

**Figure 14.** (a) Far-UV spectra and (b) mean residue ellipticity at 235 nm of Trpzip4 in  $[\text{C}_4\text{mpy}][\text{Tf}_2\text{N}]$  as a function of temperature. The spectra in (a) are shown for 10 °C intervals from 4 °C to 94 °C.

## References

1. S. M. Kelly, T. J. Jess and N. C. Price, *Biochim. Biophys. Acta*, 2005, **1751**, 119.
